# Supplementary material for: Should anti-tobacco media messages be culturally targeted for Indigenous populations? A systematic review and narrative synthesis
Source: HighWire-hosted journal article supplement (doi:10.1136/tobaccocontrol-2012-050436), 2012-08-22
Supplement: tobaccocontrol-2012-050436_Appendix_1.pdf [file tobaccocontrol-2012-050436_Appendix_1.pdf]

## **APPENDIX 1**

Australian specific databases via Informit:

- AMI: Australasian Medical Index
- APAFT: Australian Public Affairs Full Text
- APAIS ATSI: Australian Public Affairs Information Service - Aboriginal and Torres Strait Islander Subset
- APAIS: Australian Public Affairs Information Service
- APAIS-Health: Australian Public Affairs Information Service - Health
- ATSIHealth: Aboriginal and Torres Strait Islander Health Bibliography
- FAMILY-ATSI: Australian Family & Society Abstracts. Aboriginal and Torres Strait Island Subset
- FAMILY: Australian Family and Society Abstracts Database
- Family & Society Plus
- Health & Society Database: H&S
- Indigenous Australia
- Indigenous Studies Bibliography: AIATSIS
- Informit e-Library : Health Collection
